# Supplementary material for: Increased numbers of nucleoli in a genome-wide RNAi screen reveal proteins that link the cell cycle to RNA polymerase I transcription
Source: PubMed Central journal article supplement — Mol Biol Cell. 2021 Apr 19;32(9):956–73. doi: 10.1091/mbc.E20-10-0670 (PMC8108525; doi:10.1091/mbc.e20-10-0670), 2021-04-19
Supplement: mbc-32-956-s001.pdf [file mbc-32-956-s001.pdf]

# Supplemental Materials

*Molecular Biology of the Cell*

Ogawa et al.

**Supplemental Table S1.** The 113 high confidence screen hits that, when depleted, caused an increase in the percentage of nuclei with  $\geq 5$  nucleoli. Yeast ortholog,  $\geq 5$  nucleoli per nucleus normalized percent effect (NPE), percent viability, and nucleolar localization [1=NOPdb (Leung *et al.*, 2006; Ahmad *et al.*, 2009); 2=T-cell nucleolar proteome (Jarboui *et al.*, 2011); 3=Human Protein Atlas (Thul *et al.*, 2017)] indicated. The positive control, KIF11, was the top hit.

| Screen hit (HGNC) | Yeast ortholog | $\geq 5$ nucleoli per nucleus NPE | Percent viability | Nucleolar (Y/N) |
|-------------------|----------------|-----------------------------------|-------------------|-----------------|
| KIF11             | Cin8/Kip1      | 68.75                             | 19.00             | N               |
| CDCA8             | Nbl1           | 66.59                             | 12.91             | Y [1, 3]        |
| ASIC1             |                | 65.17                             | 5.21              | N               |
| CMPK2             | Cdc8           | 64.91                             | 17.38             | N               |
| WBP11             |                | 64.64                             | 12.61             | Y [1]           |
| KRT222            |                | 61.43                             | 30.53             | N               |
| MICA              |                | 60.63                             | 28.23             | N               |
| ATAD5             | Elg1           | 59.75                             | 27.67             | N               |
| RAP2C             |                | 57.83                             | 38.96             | N               |
| SKP1              | Skp1           | 57.64                             | 13.00             | Y [1]           |
| TPX2              |                | 53.84                             | 5.99              | Y [2]           |
| CIAO2B            |                | 47.53                             | 26.97             | N               |
| PRRT2             |                | 47.35                             | 21.61             | N               |
| RFFL              |                | 47.17                             | 8.70              | N               |
| C11orf63          |                | 47.03                             | 11.05             | N               |
| ZER1              |                | 46.73                             | 43.72             | N               |
| MAN1A1            | Mnl2           | 46.40                             | 35.63             | N               |
| MFSD4             |                | 46.29                             | 15.22             | N               |
| INCENP            | Sli15          | 45.64                             | 18.92             | Y [1, 2]        |
| SHC3              |                | 45.32                             | 21.55             | N               |
| ENY2              | Sus1           | 41.93                             | 6.02              | N               |
| CUL1              | Cdc53          | 41.61                             | 36.50             | Y [3]           |
| SHROOM2           |                | 40.79                             | 16.04             | N               |
| CTF1              |                | 40.36                             | 8.66              | N               |
| MDN1              | Rea1           | 39.82                             | 29.07             | Y [1, 2, 3]     |

|          |           |       |       |          |
|----------|-----------|-------|-------|----------|
| ZDHHC17  | Akr1/2    | 39.45 | 53.42 | N        |
| CDCA5    |           | 39.33 | 9.55  | N        |
| CASP8AP2 |           | 39.14 | 13.82 | Y [2, 3] |
| HYPK     |           | 38.87 | 15.80 | N        |
| INKA1    |           | 38.64 | 14.41 | N        |
| NAT2     |           | 38.52 | 27.49 | N        |
| IRF2BP1  |           | 37.62 | 38.21 | N        |
| PMM2     | Sec53     | 37.35 | 23.22 | N        |
| GLYATL2  |           | 36.68 | 28.51 | N        |
| TTC22    |           | 36.12 | 21.61 | N        |
| XRCC5    | Yku80     | 35.61 | 42.14 | Y [1, 2] |
| CYP4V2   |           | 35.61 | 58.17 | N        |
| RRM1     | Rnr1/3    | 35.33 | 9.46  | N        |
| FAM221A  |           | 34.73 | 49.23 | N        |
| ECHDC2   |           | 34.49 | 22.43 | N        |
| RBBP8    |           | 33.82 | 21.42 | N        |
| CCDC81   |           | 33.78 | 22.74 | N        |
| KRBA1    |           | 32.89 | 29.14 | N        |
| PRUNE    |           | 32.76 | 19.24 | N        |
| SCRN3    |           | 32.28 | 63.05 | N        |
| AGR2     |           | 31.52 | 25.80 | N        |
| SMG5     | Ebs1/Est1 | 31.03 | 27.66 | N        |
| LAPTM5   |           | 30.61 | 32.18 | N        |
| DBNDD1   |           | 30.51 | 10.27 | N        |
| RFC1     | Rfc1      | 30.18 | 46.61 | Y [1, 2] |
| IFT88    |           | 30.16 | 57.16 | N        |
| C9orf142 |           | 29.86 | 29.73 | N        |
| SGOL1    |           | 29.67 | 16.63 | N        |
| EBF3     |           | 29.63 | 36.33 | N        |
| MCM6     | Mcm6      | 29.60 | 54.59 | Y [1, 2] |
| OSBP2    | Hes1/Kes1 | 29.58 | 14.65 | N        |
| PRAM1    |           | 29.56 | 14.07 | N        |
| GCNT2    |           | 29.56 | 34.99 | N        |
| ZNF219   |           | 29.31 | 45.34 | N        |
| LDB1     |           | 29.25 | 50.16 | N        |

|          |                  |       |       |             |
|----------|------------------|-------|-------|-------------|
| FAM58A   |                  | 29.22 | 22.15 | N           |
| LIG3     |                  | 29.07 | 40.91 | Y [2]       |
| SNX21    |                  | 29.02 | 25.45 | N           |
| GLTP     |                  | 28.95 | 20.74 | N           |
| GZF1     |                  | 28.93 | 47.20 | Y [3]       |
| MAP4K5   |                  | 28.92 | 27.53 | N           |
| SLC26A7  |                  | 28.77 | 61.21 | N           |
| TARS2    | Mst1             | 28.66 | 36.20 | N           |
| ABCE1    | Rli1             | 28.57 | 25.65 | Y [2]       |
| LCORL    |                  | 28.28 | 21.07 | N           |
| TYMP     |                  | 28.06 | 72.51 | N           |
| MRPL52   |                  | 27.86 | 36.04 | N           |
| RIMS3    | Tcb3             | 27.82 | 10.82 | Y [3]       |
| WBSCR27  |                  | 27.79 | 33.22 | N           |
| H1-10    | Hho1             | 27.78 | 31.61 | Y [1, 2, 3] |
| ZNF678   |                  | 27.75 | 19.58 | Y [3]       |
| RACGAP1  | Bem2/Rga1/2/Rgd1 | 27.62 | 15.60 | N           |
| STK24    | Kic1/Pbs2        | 27.53 | 13.92 | Y [3]       |
| SLC2A12  | Stl1             | 27.49 | 71.34 | N           |
| NGRN     | Rrg9             | 27.47 | 25.68 | N           |
| LUC7L    | Luc7             | 27.15 | 25.86 | N           |
| YIPF7    | Yip1             | 27.11 | 5.29  | N           |
| WRAP53   | Swt21            | 27.10 | 9.48  | N           |
| DYNC1H1  | Dyn1             | 26.87 | 19.67 | Y [1, 2]    |
| GEN1     |                  | 26.82 | 51.87 | N           |
| NR0B2    |                  | 26.79 | 37.50 | N           |
| ANKEF1   |                  | 26.73 | 22.43 | Y [3]       |
| KTN1     |                  | 26.70 | 14.57 | N           |
| FGD4     | Cdc24/Rom1/2     | 26.65 | 28.85 | N           |
| MIA      |                  | 26.64 | 39.43 | N           |
| CCN4     |                  | 26.52 | 46.48 | N           |
| GOLGA8EP |                  | 26.48 | 20.11 | N           |
| TOPBP1   | Dpb11            | 26.37 | 10.58 | Y [1]       |
| SMAP2    | Glo3/Gts1        | 26.24 | 33.90 | N           |
| OXNAD1   | Aim33/Pga3       | 26.16 | 60.29 | N           |

|          |            |       |       |       |
|----------|------------|-------|-------|-------|
| HSD11B2  |            | 26.09 | 21.32 | N     |
| MARCH9   | Ssm4       | 26.06 | 68.46 | N     |
| TM2D1    |            | 26.04 | 19.78 | N     |
| PCOLCE2  |            | 26.02 | 19.56 | N     |
| CAMK2N1  |            | 25.99 | 26.33 | N     |
| RAPH1    |            | 25.95 | 6.16  | N     |
| MPV17L2  | Mpv17      | 25.65 | 13.92 | N     |
| FAM98A   |            | 25.60 | 10.13 | N     |
| SUV39H1  |            | 25.56 | 32.30 | N     |
| TAF1D    |            | 25.54 | 27.66 | N     |
| NFYB     | Hap3       | 25.50 | 41.60 | N     |
| MASTL    | Pkh3/Rim15 | 25.41 | 32.46 | N     |
| GTF2IRD1 |            | 25.38 | 24.82 | N     |
| SCN2B    |            | 25.29 | 15.56 | N     |
| MLL3     |            | 25.28 | 73.70 | N     |
| DDAH1    |            | 25.27 | 55.36 | Y [3] |
| NLRC5    | Gip3/Her1  | 25.12 | 46.44 | N     |
| SMAD5    |            | 25.00 | 61.84 | N     |

**Supplemental Table S2.** Molecular and cellular function core analysis in Ingenuity Pathway

Analysis (Qiagen) revealed a significant association with 23 categories

| Category                                   | $-\log_{10}$<br>p-value | # of hits | Hits                                                                                                                                                                                                                       |
|--------------------------------------------|-------------------------|-----------|----------------------------------------------------------------------------------------------------------------------------------------------------------------------------------------------------------------------------|
| Cell cycle                                 | 5.66                    | 31        | CAMK2N1, CASP8AP2, CDCA5, CDCA8, CIAO2B, CUL1, DYNC1H1, ENY2, GEN1, HYPK, INCENP, KIF11, LIG3, MASTL, MCM6, MIA, NR0B2, RACGAP1, RBBP8, RFC1, RFFL, RRM1, SGO1, SHROOM2, SKP1, SUV39H1, TAF1D, TOPBP1, TPX2, XRCC5, ZNF219 |
| Cellular Assembly and Organization         | 4.95                    | 24        | CDCA5, CDCA8, CIAO2B, CUL1, DYNC1H1, FGD4, GEN1, IFT88, INCENP, JHY, KIF11, LIG3, MIA, OSBP2, PRUNE1, RACGAP1, RAPH1, RBBP8, RIMS3, SGO1, SUV39H1, TOPBP1, TPX2, XRCC5                                                     |
| DNA Replication, Recombination, and Repair | 4.95                    | 27        | ATAD5, CDCA5, CIAO2B, CMPK2, CUL1, DYNC1H1, ENY2, GEN1, INCENP, KIF11, LIG3, MCM6, MICA, PAXX, RACGAP1, RBBP8, RFC1, RRM1, SGO1, STK24, SUV39H1, TOPBP1, TPX2, TYMP, WRAP53, XRCC5, ZNF219                                 |

|                                      |      |    |                                                                                                                                                                                                                                                          |
|--------------------------------------|------|----|----------------------------------------------------------------------------------------------------------------------------------------------------------------------------------------------------------------------------------------------------------|
| Cell Morphology                      | 3.32 | 16 | CTF1, FGD4, IFT88, KIF11, LDB1, OSBP2, RACGAP1, RAPH1, RBBP8, RIMS3, SMAD5, SUV39H1, TOPBP1, TPX2, TYMP, XRCC5                                                                                                                                           |
| Nucleic Acid                         | 2.91 | 4  | CMPK2, PMM2, RRM1, TYMP                                                                                                                                                                                                                                  |
| Small Molecule<br>Biochemistry       | 2.91 | 13 | CMPK2, DYNC1H1, GLYATL2, HSD11B2, KMT2C, NAT2, NR0B2, OSBP2, PMM2, RAPH1, RRM1, SUV39H1, TYMP                                                                                                                                                            |
| Molecular Transport                  | 2.69 | 6  | KMT2C, NR0B2, RACGAP1, RAPH1,                                                                                                                                                                                                                            |
| Cellular Function and<br>Maintenance | 2.42 | 17 | CDCA5, DYNC1H1, FGD4, IFT88, JHY, KIF11, MIA, PRUNE1, RAPH1, RBBP8,                                                                                                                                                                                      |
| Cell Death and<br>Survival           | 2.42 | 36 | ABCE1, AGR2, ASIC1, ATAD5, CASP8AP2, CCN4, CDCA5, CTF1, CUL1, DYNC1H1, FGD4, HSD11B2, HYPK, IFT88, INCENP, KIF11, LIG3, MDN1, MIA, MICA, NR0B2, OSBP2, PAXX, RACGAP1, RFC1, RRM1, SHC3, SHROOM2, SMAD5, STK24, SUV39H1, TM2D1, TOPBP1, TPX2, TYMP, XRCC5 |
| Cell-To-Cell Signaling               | 2.32 | 5  | ASIC1, GTF2IRD1, HSD11B2, IFT88, MICA                                                                                                                                                                                                                    |
| Cellular Compromise                  | 2.32 | 9  | ASIC1, CTF1, CUL1, DYNC1H1, KIF11,                                                                                                                                                                                                                       |
| Cellular Development                 | 2.32 | 15 | CCN4, CDCA5, CTF1, CUL1, EBF3, IFT88, MIA, OSBP2, PRUNE1, RAPH1, RFC1, RIMS3, SMAD5, STK24, SUV39H1                                                                                                                                                      |

|                                   |      |    |                                                                                                             |
|-----------------------------------|------|----|-------------------------------------------------------------------------------------------------------------|
| Cellular Growth and Proliferation | 2.32 | 16 | CCN4, CDCA5, CTF1, CUL1, EBF3, HSD11B2, IFT88, LDB1, MIA, OSBP2, PRUNE1, RAPH1, RFC1, RIMS3, SMAD5, SUV39H1 |
| Cellular Movement                 | 2.32 | 5  | CCN4, FGD4, IFT88, INCENP, MIA                                                                              |
| Cellular Response to              | 2.32 | 2  | PAXX, XRCC5                                                                                                 |
| Drug Metabolism                   | 2.32 | 3  | CMPK2, HSD11B2, NAT2                                                                                        |
| Lipid Metabolism                  | 2.32 | 7  | DYNC1H1, GLYATL2, HSD11B2, KMT2C,                                                                           |
| Amino Acid                        | 2.02 | 2  | GLYATL2, SUV39H1                                                                                            |
| Carbohydrate                      | 2.02 | 2  | PMM2, RAPH1                                                                                                 |
| Gene Expression                   | 2.02 | 3  | LIG3, NR0B2, SUV39H1                                                                                        |
| Post-Translational                | 2.02 | 4  | FGD4, GLYATL2, MAP4K5, SUV39H1                                                                              |
| Vitamin and Mineral               | 1.84 | 1  | NR0B2                                                                                                       |
| Cell Signaling                    | 1.70 | 2  | FGD4, MAP4K5                                                                                                |



**Supplemental Table S3.** Nuclear area analysis of screen hit depletions comparing nuclei with 0-4 nucleoli to nuclei with  $\geq 5$  nucleoli. For each screen hit depletion, nuclei were classified as either nuclei with 0-4 nucleoli or  $\geq 5$  nucleoli and the average nuclear area was calculated (n=3 for hits; n=6 for controls). Significance was determined by unpaired t-tests and based on a False Discovery Rate approach using the two-stage step-up method of Benjamini, Krieger and Yekutieli (n=3 or 6;  $q < 0.01 / -\log q\text{-value} > 2$ ). siRISC-free=negative control. siKIF11 (pool)=screen positive control.

| Screen Hit<br>(siRNA HGNC, -<br>last 2 digits of<br>product<br>number) | Nuclear area<br>0-4 nucleoli<br>(mean $\pm$ SD) | Nuclear area<br>$\geq 5$ nucleoli<br>(mean $\pm$ SD) | Significance<br>(q-value) |
|------------------------------------------------------------------------|-------------------------------------------------|------------------------------------------------------|---------------------------|
| siRISC-free                                                            | 206.4 $\pm$ 2.9                                 | 365.7 $\pm$ 6.5                                      | q<0.0001                  |
| siKIF11 (pool)                                                         | 435.8 $\pm$ 10.1                                | 666.9 $\pm$ 18.1                                     | q<0.0001                  |
| siKIF11 -05                                                            | 382.2 $\pm$ 10.4                                | 572.5 $\pm$ 14.5                                     | q<0.0001                  |
| siKIF11 -06                                                            | 374.9 $\pm$ 11.9                                | 640.1 $\pm$ 29.5                                     | q<0.001                   |
| siKIF11 -07                                                            | 409.2 $\pm$ 16.8                                | 676.5 $\pm$ 26.3                                     | q<0.001                   |
| siKIF11 -08                                                            | 430.4 $\pm$ 22.1                                | 678.7 $\pm$ 28.5                                     | q<0.001                   |
| siABCE1 -01                                                            | 345.6 $\pm$ 15.5                                | 567.6 $\pm$ 22.4                                     | q<0.001                   |
| siABCE1 -02                                                            | 244.4 $\pm$ 3.5                                 | 403.3 $\pm$ 6.5                                      | q<0.0001                  |

|              |              |              |          |
|--------------|--------------|--------------|----------|
| siABCE1 -04  | 270.8 ± 4.6  | 404.7 ± 11.5 | q<0.0001 |
| siABCE1 -17  | 243.8 ± 6.0  | 374.3 ± 3.7  | q<0.0001 |
| siATAD5 -01  | 342.5 ± 11.0 | 503.6 ± 23.5 | q<0.001  |
| siATAD5 -02  | 245.6 ± 3.2  | 356.4 ± 8.2  | q<0.0001 |
| siATAD5 -03  | 264.5 ± 7.1  | 411.7 ± 8.2  | q<0.0001 |
| siATAD5 -04  | 262.2 ± 5.9  | 417.5 ± 21.0 | q<0.001  |
| siCCN4 -01   | 254.2 ± 6.1  | 437.5 ± 5.7  | q<0.0001 |
| siCCN4 -02   | 359.6 ± 30.2 | 551.9 ± 57.1 | q<0.01   |
| siCCN4 -03   | 294.4 ± 6.8  | 417.0 ± 7.5  | q<0.0001 |
| siCCN4 -17   | 347.8 ± 7.6  | 519.7 ± 11.3 | q<0.0001 |
| siCDC48 -01  | 318.2 ± 21.5 | 892.2 ± 1.5  | q<0.0001 |
| siCDC48 -02  | 342.4 ± 5.0  | 887.7 ± 36.1 | q<0.0001 |
| siCDC48 -03  | 301.8 ± 3.9  | 634.8 ± 12.7 | q<0.0001 |
| siCDC48 -04  | 322.3 ± 8.6  | 728.9 ± 4.6  | q<0.0001 |
| siCIAO2B -01 | 286.0 ± 5.4  | 412.7 ± 3.2  | q<0.0001 |
| siCIAO2B -03 | 277.8 ± 9.4  | 446.7 ± 21.1 | q<0.001  |
| siCIAO2B -04 | 270.5 ± 1.9  | 445.7 ± 4.1  | q<0.0001 |

|               |              |              |          |
|---------------|--------------|--------------|----------|
| siCIAO2B -18  | 305.7 ± 4.4  | 433.4 ± 16.5 | q<0.001  |
| siDYNC1H1 -01 | 311.5 ± 2.3  | 464.9 ± 13.1 | q<0.0001 |
| siDYNC1H1 -02 | 296.8 ± 2.4  | 511.1 ± 6.1  | q<0.0001 |
| siDYNC1H1 -03 | 427.8 ± 2.6  | 644.3 ± 4.9  | q<0.0001 |
| siDYNC1H1 -04 | 271.8 ± 5.5  | 483.0 ± 3.6  | q<0.0001 |
| siENY2 -01    | 284.6 ± 3.5  | 507.5 ± 12.6 | q<0.0001 |
| siENY2 -02    | 254.6 ± 5.3  | 446.6 ± 15.3 | q<0.0001 |
| siENY2 -03    | 272.8 ± 1.8  | 464.5 ± 11.5 | q<0.0001 |
| siENY2 -04    | 307.5 ± 6.2  | 479.5 ± 1.7  | q<0.0001 |
| siFAM98A -01  | 395.4 ± 5.7  | 663.7 ± 15.4 | q<0.0001 |
| siFAM98A -02  | 357.8 ± 24.9 | 554.2 ± 27.6 | q<0.001  |
| siFAM98A -03  | 206.6 ± 3.9  | 386.6 ± 9.8  | q<0.0001 |
| siFAM98A -04  | 329.4 ± 4.2  | 505.3 ± 14.8 | q<0.0001 |
| siH1-10 -01   | 274.9 ± 10.2 | 444.9 ± 16.8 | q<0.001  |
| siH1-10 -02   | 313.8 ± 4.2  | 493.6 ± 9.2  | q<0.0001 |
| siH1-10 -03   | 244.2 ± 4.9  | 392.5 ± 8.5  | q<0.0001 |
| siH1-10 -04   | 323.7 ± 6.4  | 514.4 ± 37.9 | q<0.01   |

|              |              |              |          |
|--------------|--------------|--------------|----------|
| siINCENP -01 | 340.5 ± 9.4  | 832.2 ± 13.0 | q<0.0001 |
| siINCENP -02 | 426.7 ± 14.7 | 788.9 ± 10.0 | q<0.0001 |
| siINCENP -03 | 449.7 ± 8.8  | 886.4 ± 6.5  | q<0.0001 |
| siINCENP -04 | 355.5 ± 6.2  | 672.4 ± 13.8 | q<0.0001 |
| siINKA1 -01  | 417.5 ± 7.3  | 630.3 ± 9.4  | q<0.0001 |
| siINKA1 -02  | 262.5 ± 3.4  | 488.3 ± 13.9 | q<0.0001 |
| siINKA1 -03  | 258.9 ± 8.2  | 382.9 ± 1.4  | q<0.0001 |
| siINKA1 -04  | 377.2 ± 5.9  | 579.2 ± 12.5 | q<0.0001 |
| siKTN1 -17   | 301.1 ± 16.8 | 467.2 ± 7.8  | q<0.001  |
| siKTN1 -18   | 364.0 ± 3.1  | 532.1 ± 11.4 | q<0.0001 |
| siKTN1 -19   | 216.3 ± 3.0  | 375.5 ± 5.0  | q<0.0001 |
| siKTN1 -20   | 262.9 ± 3.8  | 420.5 ± 11.7 | q<0.0001 |
| siLUC7L -01  | 299.1 ± 8.4  | 451.4 ± 14.6 | q<0.001  |
| siLUC7L -02  | 278.5 ± 12.5 | 474.4 ± 27.6 | q<0.001  |
| siLUC7L -03  | 245.2 ± 3.2  | 379.3 ± 7.9  | q<0.0001 |
| siLUC7L -04  | 281.2 ± 12.3 | 424.0 ± 21.0 | q<0.001  |
| siMDN1 -03   | 251.2 ± 3.0  | 388.2 ± 12.3 | q<0.0001 |

|               |              |              |          |
|---------------|--------------|--------------|----------|
| siMDN1 -17    | 343.7 ± 4.7  | 542.5 ± 14.4 | q<0.0001 |
| siMDN1 -18    | 280.5 ± 6.2  | 460.7 ± 8.9  | q<0.0001 |
| siMDN1 -19    | 279.3 ± 2.5  | 431.6 ± 10.9 | q<0.0001 |
| siRACGAP1 -01 | 318.7 ± 3.5  | 585.2 ± 6.8  | q<0.0001 |
| siRACGAP1 -02 | 285.1 ± 9.7  | 540.0 ± 5.5  | q<0.0001 |
| siRACGAP1 -03 | 328.5 ± 10.5 | 624.4 ± 13.5 | q<0.0001 |
| siRACGAP1 -04 | 300.5 ± 9.1  | 612.2 ± 28.2 | q<0.0001 |
| siRFC1 -01    | 268.2 ± 5.5  | 431.4 ± 6.8  | q<0.0001 |
| siRFC1 -02    | 288.4 ± 5.9  | 450.9 ± 3.2  | q<0.0001 |
| siRFC1 -03    | 288.9 ± 11.5 | 418.6 ± 12.7 | q<0.001  |
| siRFC1 -04    | 203.3 ± 1.5  | 412.1 ± 10.0 | q<0.0001 |
| siSTK24 -05   | 302.4 ± 4.7  | 479.9 ± 14.3 | q<0.0001 |
| siSTK24 -21   | 214.0 ± 0.8  | 385.5 ± 10.9 | q<0.0001 |
| siSTK24 -22   | 269.5 ± 3.2  | 427.1 ± 11.2 | q<0.0001 |
| siSTK24 -23   | 311.2 ± 3.1  | 439.1 ± 9.7  | q<0.0001 |
| siTPX2 -01    | 413.9 ± 25.9 | 641.0 ± 31.6 | q<0.001  |
| siTPX2 -02    | 367.8 ± 11.9 | 613.8 ± 24.1 | q<0.001  |

|              |             |              |          |
|--------------|-------------|--------------|----------|
| siTPX2 -03   | 352.0 ± 4.8 | 559.8 ± 0.6  | q<0.0001 |
| siTPX2 -04   | 299.9 ± 2.2 | 570.1 ± 5.9  | q<0.0001 |
| siWRAP53 -19 | 211.7 ± 1.4 | 389.8 ± 4.1  | q<0.0001 |
| siWRAP53 -20 | 276.9 ± 2.9 | 407.9 ± 7.7  | q<0.0001 |
| siWRAP53 -21 | 279.4 ± 5.5 | 457.2 ± 17.4 | q<0.0001 |
| siWRAP53 -22 | 288.0 ± 1.8 | 440.0 ± 5.4  | q<0.0001 |
| siXRCC5 -01  | 243.6 ± 5.8 | 378.0 ± 3.6  | q<0.0001 |
| siXRCC5 -02  | 238.6 ± 1.1 | 389.1 ± 10.2 | q<0.0001 |
| siXRCC5 -03  | 218.0 ± 2.9 | 370.8 ± 6.5  | q<0.0001 |
| siXRCC5 -04  | 204.7 ± 2.2 | 370.7 ± 7.4  | q<0.0001 |

**Supplemental Table S4.** Cell cycle analysis of screen hits selected for validation by oligonucleotide deconvolution. Each siRNA in the pool of 4 was tested independently (n=3). Controls, siRISC-free and the siKIF11 pool, were also assayed (n=48). The column with the number (No.) of cells is the total sum of nuclei analyzed in all replicates and is number of cells used to generate the cumulative histograms in Figure 5, **A**. Significance is listed in parentheses below the mean  $\pm$  SD and was determined by unpaired t-tests relative to siRISC-free and a False Discovery Rate approach using the two-stage step-up method of Benjamini, Krieger and Yekutieli (n=3 or 48; q<0.01=\*; q<0.001=\*\*; q<0.0001=\*\*\*; ns=not significant). A column that includes the  $\geq 5$  nucleoli per nucleus normalized percent effect (NPE) is also included. NPE in black=validated; NPE in red=not validated.

| Screen Hit<br>(siRNA HGNC, -<br>last 2 digits of<br>product<br>number) | No. of<br>cells<br>(sum) | % G0/G1<br>(mean $\pm$<br>SD) | % S<br>(mean $\pm$<br>SD)   | % G2/M<br>(mean $\pm$<br>SD) | % >4N<br>(mean $\pm$<br>SD)  | $\geq 5$<br>nucleoli<br>per<br>nucleus<br>NPE |
|------------------------------------------------------------------------|--------------------------|-------------------------------|-----------------------------|------------------------------|------------------------------|-----------------------------------------------|
| siRISC-free                                                            | 498,155                  | 48.3 $\pm$ 2.0                | 10.2 $\pm$ 1.1              | 20.3 $\pm$ 0.8               | 2.7 $\pm$ 0.5                | 0                                             |
| siKIF11 (pool)                                                         | 93,027                   | 12.2 $\pm$ 1.2<br>(q<0.0001)  | 7.5 $\pm$ 0.8<br>(q<0.0001) | 60.6 $\pm$ 1.7<br>(q<0.0001) | 12.1 $\pm$ 1.1<br>(q<0.0001) | 100                                           |
| siKIF11 -05                                                            | 3426                     | 16.5 $\pm$ 1.9<br>(q<0.0001)  | 9.1 $\pm$ 1.2<br>(ns)       | 56.1 $\pm$ 2.5<br>(q<0.0001) | 7.2 $\pm$ 1.8<br>(q<0.0001)  | 89.98                                         |
| siKIF11 -06                                                            | 6816                     | 15.8 $\pm$ 1.0                | 8.7 $\pm$ 0.3               | 56.7 $\pm$ 0.8               | 9.9 $\pm$ 0.3                | 118.62                                        |

|             |       |                           |                           |                          |                         |        |
|-------------|-------|---------------------------|---------------------------|--------------------------|-------------------------|--------|
|             |       | (q<0.0001)                | (q<0.01)                  | (q<0.0001)               | (q<0.0001)              |        |
| siKIF11 -07 | 2154  | 23.8 ± 4.5<br>(q<0.0001)  | 10.8 ± 2.1<br>(ns)        | 42.1 ± 1.6<br>(q<0.0001) | 6.9 ± 2.4<br>(q<0.0001) | 74.75  |
| siKIF11 -08 | 2721  | 20.6 ± 2.3<br>(q<0.0001)  | 10.5 ± 1.0<br>(ns)        | 50.7 ± 3.5<br>(q<0.0001) | 7.3 ± 0.4<br>(q<0.0001) | 116.70 |
| siABCE1 -01 | 12653 | 30.6 ± 0.7<br>(q<0.0001)  | 20.0 ± 0.3<br>(q<0.0001)  | 33.6 ± 1.0<br>(q<0.0001) | 8.3 ± 0.6<br>(q<0.0001) | 50.71  |
| siABCE1 -02 | 22023 | 42.7 ± 1.0<br>(q<0.0001)  | 15.4 ± 0.7<br>(q<0.0001)  | 25.9 ± 0.6<br>(q<0.0001) | 5.8 ± 0.3<br>(q<0.0001) | 22.63  |
| siABCE1 -04 | 19958 | 49.9 ± 1.5<br>(ns)        | 23.3 ± 0.4<br>(q<0.0001)  | 15.9 ± 0.9<br>(q<0.0001) | 1.8 ± 0.2<br>(q<0.01)   | 26.31  |
| siABCE1 -17 | 21264 | 50.2 ± 2.9<br>(ns)        | 12.9 ± 0.8<br>(q<0.0001)  | 21.7 ± 1.6<br>(q<0.001)  | 1.9 ± 0.2<br>(q<0.01)   | 9.86   |
| siATAD5 -01 | 11302 | 32.3 ± 14.3<br>(q<0.0001) | 32.3 ± 11.6<br>(q<0.0001) | 24.1 ± 1.6<br>(q<0.0001) | 3.9 ± 2.4<br>(q<0.01)   | 55.60  |
| siATAD5 -02 | 17992 | 49.9 ± 3.5<br>(ns)        | 19.4 ± 2.0<br>(q<0.0001)  | 22.3 ± 1.2<br>(q<0.0001) | 1.5 ± 0.4<br>(q<0.001)  | 16.49  |
| siATAD5 -03 | 21010 | 45.1 ± 1.9                | 17.2 ± 0.9                | 25.7 ± 1.1               | 2.7 ± 0.2               | 25.01  |



|             |       |                          |                          |                          |                          |       |
|-------------|-------|--------------------------|--------------------------|--------------------------|--------------------------|-------|
|             |       | (q<0.01)                 | (q<0.0001)               | (q<0.0001)               | (ns)                     |       |
| siATAD5 -04 | 14337 | 37.0 ± 5.6<br>(q<0.0001) | 19.8 ± 3.9<br>(q<0.0001) | 27.8 ± 2.2<br>(q<0.0001) | 4.1 ± 0.5<br>(q<0.0001)  | 22.60 |
| siCCN4 -01  | 24641 | 45.9 ± 0.9<br>(q<0.01)   | 20.3 ± 1.8<br>(q<0.0001) | 15.4 ± 0.4<br>(q<0.0001) | 2.6 ± 0.2<br>(ns)        | 17.85 |
| siCCN4 -02  | 4868  | 40.6 ± 4.3<br>(q<0.0001) | 14.6 ± 2.0<br>(q<0.0001) | 30.8 ± 3.3<br>(q<0.0001) | 2.5 ± 0.6<br>(ns)        | 18.51 |
| siCCN4 -03  | 7630  | 44.5 ± 1.7<br>(q<0.01)   | 13.7 ± 1.0<br>(q<0.0001) | 27.8 ± 0.3<br>(q<0.0001) | 2.0 ± 0.4<br>(ns)        | 23.89 |
| siCCN4 -17  | 12550 | 35.7 ± 2.2<br>(q<0.0001) | 24.5 ± 1.1<br>(q<0.0001) | 28.1 ± 0.3<br>(q<0.0001) | 3.3 ± 0.5<br>(ns)        | 42.10 |
| siCDCA8 -01 | 6261  | 10.6 ± 0.4<br>(q<0.0001) | 7.9 ± 0.8<br>(q<0.001)   | 26.6 ± 0.6<br>(q<0.0001) | 43.2 ± 0.5<br>(q<0.0001) | 82.17 |
| siCDCA8 -02 | 5595  | 10.4 ± 0.7<br>(q<0.0001) | 8.7 ± 0.3<br>(ns)        | 23.8 ± 1.1<br>(q<0.0001) | 45.2 ± 1.5<br>(q<0.0001) | 60.19 |
| siCDCA8 -03 | 5073  | 30.5 ± 1.0<br>(q<0.0001) | 14.6 ± 0.9<br>(q<0.0001) | 27.0 ± 0.8<br>(q<0.0001) | 13.6 ± 1.3<br>(q<0.0001) | 23.40 |
| siCDCA8 -04 | 8186  | 23.7 ± 0.4               | 12.0 ± 0.8               | 28.7 ± 0.5               | 20.4 ± 0.1               | 44.40 |

|               |       |                          |                          |                          |                         |       |
|---------------|-------|--------------------------|--------------------------|--------------------------|-------------------------|-------|
|               |       | (q<0.0001)               | (q<0.01)                 | (q<0.0001)               | (q<0.0001)              |       |
| siCIAO2B -01  | 16932 | 42.3 ± 2.1<br>(q<0.0001) | 32.0 ± 4.2<br>(q<0.0001) | 16.3 ± 0.8<br>(q<0.0001) | 1.7 ± 0.0<br>(q<0.001)  | 24.41 |
| siCIAO2B -03  | 14686 | 38.2 ± 1.6<br>(q<0.0001) | 32.7 ± 1.7<br>(q<0.0001) | 17.1 ± 0.7<br>(q<0.0001) | 2.1 ± 0.2<br>(ns)       | 7.62  |
| siCIAO2B -04  | 19264 | 41.6 ± 1.5<br>(q<0.0001) | 24.0 ± 1.8<br>(q<0.0001) | 21.9 ± 0.8<br>(q<0.001)  | 4.8 ± 0.2<br>(q<0.0001) | 15.48 |
| siCIAO2B -18  | 14660 | 41.3 ± 3.7<br>(q<0.0001) | 37.7 ± 3.5<br>(q<0.0001) | 10.1 ± 0.3<br>(q<0.0001) | 0.9 ± 0.1<br>(q<0.0001) | 26.18 |
| siDYNC1H1 -01 | 15255 | 32.0 ± 0.3<br>(q<0.0001) | 25.3 ± 0.9<br>(q<0.0001) | 33.1 ± 1.0<br>(q<0.0001) | 4.0 ± 0.7<br>(q<0.001)  | 22.40 |
| siDYNC1H1 -02 | 16855 | 33.3 ± 0.2<br>(q<0.0001) | 21.1 ± 0.8<br>(q<0.0001) | 26.3 ± 0.2<br>(q<0.0001) | 7.1 ± 0.6<br>(q<0.0001) | 24.91 |
| siDYNC1H1 -03 | 10371 | 23.0 ± 0.7<br>(q<0.0001) | 22.4 ± 1.1<br>(q<0.0001) | 39.2 ± 0.1<br>(q<0.0001) | 6.9 ± 0.4<br>(q<0.0001) | 79.29 |
| siDYNC1H1 -04 | 21012 | 37.7 ± 1.3<br>(q<0.0001) | 18.7 ± 1.3<br>(q<0.0001) | 23.3 ± 0.5<br>(q<0.0001) | 7.0 ± 0.3<br>(q<0.0001) | 9.05  |
| siENY2 -01    | 18169 | 39.6 ± 0.7               | 25.0 ± 0.8               | 19.3 ± 0.3               | 5.3 ± 0.1               | 15.62 |

|              |       |                          |                          |                          |                         |       |
|--------------|-------|--------------------------|--------------------------|--------------------------|-------------------------|-------|
|              |       | (q<0.0001)               | (q<0.0001)               | (q<0.01)                 | (q<0.0001)              |       |
| siENY2 -02   | 10196 | 43.1 ± 1.4<br>(q<0.0001) | 15.5 ± 0.7<br>(q<0.0001) | 26.4 ± 1.3<br>(q<0.0001) | 7.0 ± 0.9<br>(q<0.0001) | 29.06 |
| siENY2 -03   | 21547 | 35.8 ± 0.5<br>(q<0.0001) | 24.5 ± 0.9<br>(q<0.0001) | 21.2 ± 0.9<br>(ns)       | 5.7 ± 0.7<br>(q<0.0001) | 24.64 |
| siENY2 -04   | 14896 | 43.8 ± 1.6<br>(q<0.0001) | 28.6 ± 0.9<br>(q<0.0001) | 16.5 ± 0.4<br>(q<0.0001) | 2.1 ± 0.5<br>(ns)       | 16.54 |
| siFAM98A -01 | 7481  | 38.5 ± 1.5<br>(q<0.0001) | 24.4 ± 1.0<br>(q<0.0001) | 23.8 ± 0.5<br>(q<0.0001) | 3.1 ± 0.4<br>(ns)       | 23.43 |
| siFAM98A -02 | 9898  | 31.0 ± 3.6<br>(q<0.0001) | 32.0 ± 1.7<br>(q<0.0001) | 23.9 ± 1.2<br>(q<0.0001) | 5.1 ± 0.6<br>(q<0.0001) | 30.61 |
| siFAM98A -03 | 31999 | 47.9 ± 0.8<br>(ns)       | 11.2 ± 0.6<br>(ns)       | 20.0 ± 0.4<br>(ns)       | 3.6 ± 0.2<br>(q<0.0001) | -1.10 |
| siFAM98A -04 | 12092 | 33.1 ± 3.6<br>(q<0.0001) | 35.2 ± 3.1<br>(q<0.0001) | 18.8 ± 0.7<br>(q<0.001)  | 4.1 ± 0.4<br>(q<0.0001) | 37.85 |
| siH1-10 -01  | 19495 | 40.2 ± 7.0<br>(q<0.0001) | 17.5 ± 5.7<br>(q<0.0001) | 27.4 ± 1.0<br>(q<0.0001) | 5.4 ± 0.3<br>(q<0.0001) | 19.98 |
| siH1-10 -02  | 3095  | 26.7 ± 1.4               | 10.9 ± 1.3               | 37.6 ± 4.7               | 5.7 ± 0.4               | 38.30 |

|              |       |                          |                          |                          |                          |        |
|--------------|-------|--------------------------|--------------------------|--------------------------|--------------------------|--------|
|              |       | (q<0.0001)               | (ns)                     | (q<0.0001)               | (q<0.0001)               |        |
| siH1-10 -03  | 20063 | 54.2 ± 0.6<br>(q<0.0001) | 10.3 ± 1.4<br>(ns)       | 19.8 ± 0.7<br>(ns)       | 2.1 ± 0.2<br>(ns)        | 16.89  |
| siH1-10 -04  | 5378  | 64.3 ± 5.4<br>(q<0.0001) | 16.2 ± 5.3<br>(q<0.0001) | 9.0 ± 0.6<br>(q<0.0001)  | 1.5 ± 0.5<br>(q<0.001)   | 10.30  |
| siINCENP -01 | 5191  | 14.1 ± 0.5<br>(q<0.0001) | 9.3 ± 1.0<br>(ns)        | 29.6 ± 0.7<br>(q<0.0001) | 28.0 ± 2.1<br>(q<0.0001) | 63.31  |
| siINCENP -02 | 6073  | 13.1 ± 1.2<br>(q<0.0001) | 7.9 ± 0.3<br>(q<0.001)   | 43.1 ± 2.0<br>(q<0.0001) | 25.7 ± 0.9<br>(q<0.0001) | 107.86 |
| siINCENP -03 | 5151  | 14.6 ± 1.9<br>(q<0.0001) | 9.5 ± 0.3<br>(ns)        | 42.4 ± 2.7<br>(q<0.0001) | 19.4 ± 0.9<br>(q<0.0001) | 84.39  |
| siINCENP -04 | 7989  | 19.9 ± 0.6<br>(q<0.0001) | 9.1 ± 0.3<br>(ns)        | 38.4 ± 0.4<br>(q<0.0001) | 20.0 ± 1.7<br>(q<0.0001) | 65.05  |
| siINKA1 -01  | 8245  | 24.3 ± 0.6<br>(q<0.0001) | 13.0 ± 1.4<br>(q<0.0001) | 50.4 ± 0.5<br>(q<0.0001) | 5.7 ± 0.2<br>(q<0.0001)  | 81.39  |
| siINKA1 -02  | 18874 | 33.1 ± 0.5<br>(q<0.0001) | 15.1 ± 0.7<br>(q<0.0001) | 28.0 ± 1.2<br>(q<0.0001) | 10.6 ± 0.9<br>(q<0.0001) | 12.47  |
| siINKA1 -03  | 20994 | 56.5 ± 1.3               | 21.2 ± 1.2               | 14.5 ± 0.1               | 1.3 ± 0.2                | 17.64  |

|             |       |                          |                          |                          |                         |       |
|-------------|-------|--------------------------|--------------------------|--------------------------|-------------------------|-------|
|             |       | (q<0.0001)               | (q<0.0001)               | (q<0.0001)               | (q<0.0001)              |       |
| siINKA1 -04 | 7543  | 30.0 ± 3.2<br>(q<0.0001) | 16.8 ± 2.7<br>(q<0.0001) | 38.3 ± 1.2<br>(q<0.0001) | 6.9 ± 0.2<br>(q<0.0001) | 31.55 |
| siKTN1 -17  | 15844 | 43.6 ± 1.3<br>(q<0.0001) | 26.6 ± 1.7<br>(q<0.0001) | 16.9 ± 0.8<br>(q<0.0001) | 3.5 ± 0.4<br>(q<0.01)   | 41.87 |
| siKTN1 -18  | 2762  | 22.7 ± 2.1<br>(q<0.0001) | 10.0 ± 0.7<br>(ns)       | 47.8 ± 1.8<br>(q<0.0001) | 4.2 ± 0.7<br>(q<0.0001) | 44.02 |
| siKTN1 -19  | 29473 | 55.4 ± 2.1<br>(q<0.0001) | 10.9 ± 0.7<br>(ns)       | 19.2 ± 0.9<br>(ns)       | 2.7 ± 0.3<br>(ns)       | 4.61  |
| siKTN1 -20  | 22507 | 46.0 ± 0.4<br>(ns)       | 18.1 ± 0.2<br>(q<0.0001) | 22.4 ± 0.6<br>(q<0.0001) | 3.9 ± 0.2<br>(q<0.001)  | 16.93 |
| siLUC7L -01 | 1855  | 30.5 ± 2.8<br>(q<0.0001) | 11.6 ± 1.4<br>(q<0.01)   | 34.1 ± 3.0<br>(q<0.0001) | 6.2 ± 2.2<br>(q<0.0001) | 36.19 |
| siLUC7L -02 | 9450  | 39.6 ± 2.7<br>(q<0.0001) | 30.3 ± 3.8<br>(q<0.0001) | 15.7 ± 0.2<br>(q<0.0001) | 2.4 ± 0.6<br>(ns)       | 6.67  |
| siLUC7L -03 | 24023 | 51.5 ± 0.7<br>(q<0.01)   | 25.4 ± 1.1<br>(q<0.0001) | 14.2 ± 0.6<br>(q<0.0001) | 1.6 ± 0.2<br>(q<0.001)  | 7.84  |
| siLUC7L -04 | 15445 | 38.4 ± 1.5               | 28.5 ± 2.5               | 21.1 ± 0.7               | 2.2 ± 0.0               | 22.01 |

|               |       |                          |                          |                          |                          |       |
|---------------|-------|--------------------------|--------------------------|--------------------------|--------------------------|-------|
|               |       | (q<0.0001)               | (q<0.0001)               | (q<0.01)                 | (ns)                     |       |
| siMDN1 -03    | 22383 | 61.8 ± 4.5<br>(q<0.0001) | 17.6 ± 4.3<br>(ns)       | 11.6 ± 0.5<br>(q<0.0001) | 1.5 ± 0.2<br>(q<0.001)   | 16.23 |
| siMDN1 -17    | 10682 | 64.0 ± 0.2<br>(q<0.0001) | 10.7 ± 0.9<br>(ns)       | 16.0 ± 0.3<br>(q<0.0001) | 1.4 ± 0.1<br>(q<0.0001)  | 10.86 |
| siMDN1 -18    | 18302 | 52.2 ± 0.9<br>(q<0.001)  | 24.3 ± 3.0<br>(q<0.0001) | 14.6 ± 0.6<br>(q<0.0001) | 1.4 ± 0.2<br>(q<0.001)   | 8.92  |
| siMDN1 -19    | 16924 | 51.6 ± 1.8<br>(q<0.01)   | 15.7 ± 1.3<br>(q<0.0001) | 18.9 ± 1.2<br>(q<0.001)  | 2.1 ± 0.2<br>(ns)        | 28.03 |
| siRACGAP1 -01 | 10345 | 28.6 ± 1.8<br>(q<0.0001) | 19.5 ± 1.6<br>(q<0.0001) | 31.1 ± 0.8<br>(q<0.0001) | 10.7 ± 0.9<br>(q<0.0001) | 51.56 |
| siRACGAP1 -02 | 14099 | 33.4 ± 1.3<br>(q<0.0001) | 15.0 ± 0.3<br>(q<0.0001) | 27.8 ± 0.6<br>(q<0.0001) | 9.0 ± 1.3<br>(q<0.0001)  | 34.13 |
| siRACGAP1 -03 | 9246  | 20.7 ± 2.0<br>(q<0.0001) | 14.2 ± 0.6<br>(q<0.0001) | 37.3 ± 1.6<br>(q<0.0001) | 17.2 ± 1.5<br>(q<0.0001) | 66.49 |
| siRACGAP1 -04 | 6630  | 15.1 ± 1.7<br>(q<0.0001) | 15.7 ± 1.0<br>(q<0.0001) | 34.3 ± 0.7<br>(q<0.0001) | 23.8 ± 2.4<br>(q<0.0001) | 58.42 |
| siRFC1 -01    | 22242 | 36.7 ± 1.0               | 21.5 ± 1.7               | 28.7 ± 0.9               | 5.1 ± 0.2                | 12.31 |

|             |       |                          |                          |                          |                         |        |
|-------------|-------|--------------------------|--------------------------|--------------------------|-------------------------|--------|
|             |       | (q<0.0001)               | (q<0.0001)               | (q<0.0001)               | (q<0.0001)              |        |
| siRFC1 -02  | 18739 | 35.2 ± 2.3<br>(q<0.0001) | 24.5 ± 0.3<br>(q<0.0001) | 27.6 ± 0.9<br>(q<0.0001) | 3.7 ± 0.4<br>(q<0.01)   | 15.79  |
| siRFC1 -03  | 18566 | 38.5 ± 2.1<br>(q<0.0001) | 24.6 ± 1.4<br>(q<0.0001) | 26.9 ± 0.6<br>(q<0.0001) | 2.6 ± 0.2<br>(ns)       | 20.99  |
| siRFC1 -04  | 32219 | 46.9 ± 0.6<br>(ns)       | 10.8 ± 1.0<br>(ns)       | 21.8 ± 0.2<br>(q<0.001)  | 4.5 ± 0.1<br>(q<0.0001) | 0.60   |
| siSTK24 -05 | 13758 | 41.3 ± 2.1<br>(q<0.0001) | 34.8 ± 1.9<br>(q<0.0001) | 15.0 ± 0.6<br>(q<0.0001) | 2.0 ± 0.3<br>(q<0.01)   | 7.04   |
| siSTK24 -21 | 30865 | 52.6 ± 2.3<br>(q<0.0001) | 11.5 ± 1.7<br>(ns)       | 19.3 ± 0.4<br>(q<0.01)   | 2.8 ± 0.2<br>(ns)       | 1.81   |
| siSTK24 -22 | 15617 | 37.4 ± 3.9<br>(q<0.0001) | 25.7 ± 2.9<br>(q<0.0001) | 23.6 ± 0.6<br>(q<0.0001) | 3.6 ± 0.4<br>(q<0.01)   | 17.66  |
| siSTK24 -23 | 11330 | 43.4 ± 3.4<br>(q<0.0001) | 37.5 ± 2.9<br>(q<0.0001) | 12.0 ± 0.8<br>(q<0.0001) | 1.4 ± 0.1<br>(q<0.0001) | 29.89  |
| siTPX2 -01  | 3189  | 18.7 ± 2.6<br>(q<0.0001) | 12.4 ± 2.2<br>(q<0.001)  | 49.8 ± 2.8<br>(q<0.0001) | 9.0 ± 0.3<br>(q<0.0001) | 38.82  |
| siTPX2 -02  | 6023  | 16.5 ± 1.3               | 10.6 ± 1.1               | 50.9 ± 0.6               | 6.7 ± 0.7               | 102.59 |

|              |       |                          |                          |                          |                         |       |
|--------------|-------|--------------------------|--------------------------|--------------------------|-------------------------|-------|
|              |       | (q<0.0001)               | (ns)                     | (q<0.0001)               | (q<0.0001)              |       |
| siTPX2 -03   | 10750 | 47.2 ± 3.5<br>(ns)       | 22.9 ± 2.6<br>(q<0.0001) | 15.9 ± 0.4<br>(q<0.0001) | 2.8 ± 0.4<br>(ns)       | 39.05 |
| siTPX2 -04   | 7667  | 34.5 ± 2.3<br>(q<0.0001) | 18.3 ± 0.6<br>(ns)       | 26.0 ± 1.3<br>(q<0.0001) | 6.1 ± 0.9<br>(q<0.0001) | 31.55 |
| siWRAP53 -19 | 31592 | 49.2 ± 1.4<br>(ns)       | 12.6 ± 1.0<br>(q<0.001)  | 21.4 ± 0.9<br>(q<0.01)   | 4.2 ± 0.4<br>(q<0.0001) | 2.90  |
| siWRAP53 -20 | 17584 | 38.1 ± 1.9<br>(q<0.0001) | 33.2 ± 0.6<br>(q<0.0001) | 16.5 ± 1.4<br>(q<0.0001) | 2.4 ± 0.3<br>(ns)       | 28.11 |
| siWRAP53 -21 | 18888 | 41.2 ± 0.6<br>(q<0.0001) | 26.9 ± 0.5<br>(q<0.0001) | 20.9 ± 0.7<br>(ns)       | 3.3 ± 0.3<br>(ns)       | 18.45 |
| siWRAP53 -22 | 17244 | 41.0 ± 1.0<br>(q<0.0001) | 29.8 ± 0.9<br>(q<0.0001) | 18.6 ± 0.2<br>(q<0.001)  | 2.4 ± 0.2<br>(ns)       | 38.53 |
| siXRCC5 -01  | 24899 | 50.9 ± 2.0<br>(q<0.01)   | 21.5 ± 1.4<br>(q<0.0001) | 18.8 ± 0.5<br>(q<0.01)   | 1.9 ± 0.3<br>(q<0.01)   | 8.08  |
| siXRCC5 -02  | 25424 | 49.4 ± 1.2<br>(ns)       | 13.2 ± 0.8<br>(q<0.0001) | 23.2 ± 1.0<br>(q<0.0001) | 3.3 ± 0.3<br>(ns)       | 6.89  |
| siXRCC5 -03  | 24903 | 48.2 ± 2.0               | 15.0 ± 0.7               | 25.8 ± 0.8               | 2.2 ± 0.4               | -1.50 |



|             |       |            |            |            |           |       |
|-------------|-------|------------|------------|------------|-----------|-------|
|             |       | (ns)       | (q<0.0001) | (q<0.0001) | (ns)      |       |
| siXRCC5 -04 | 31137 | 53.9 ± 0.8 | 10.2 ± 0.3 | 19.3 ± 0.2 | 2.7 ± 0.2 | -2.68 |
|             |       | (ns)       | (ns)       | (q<0.01)   | (ns)      |       |

**Supplemental Table S5.** Normalized percent effect (NPE) for each siRNA in the pool of 4 comparing NPE for all cells to cells in G2/M only.

| Hits      | All cells |        |       |        | G2/M cells |        |        |        |
|-----------|-----------|--------|-------|--------|------------|--------|--------|--------|
|           | 1         | 2      | 3     | 4      | 1          | 2      | 3      | 4      |
| siKIF11   | 89.98     | 118.62 | 74.75 | 116.70 | 104.40     | 130.50 | 111.60 | 133.20 |
| siINCENP  | 63.31     | 107.86 | 84.39 | 65.05  | 103.10     | 119.60 | 106.60 | 85.90  |
| siCDCA8   | 82.17     | 60.19  | 23.40 | 44.40  | 116.70     | 90.80  | 41.80  | 74.10  |
| siRACGAP1 | 51.56     | 34.13  | 66.49 | 58.42  | 73.40      | 58.90  | 89.90  | 71.90  |
| siINKA1   | 81.39     | 12.47  | 17.64 | 71.44  | 91.90      | 18.70  | 48.80  | 91.60  |
| siTPX2    | 38.82     | 102.59 | 39.05 | 31.55  | 44.60      | 125.30 | 91.20  | 64.60  |
| siKTN1    | 41.87     | 44.02  | 4.61  | 16.93  | 81.80      | 51.40  | 14.90  | 31.90  |
| siFAM98A  | 23.43     | 30.61  | -1.10 | 37.85  | 47.70      | 51.00  | -2.20  | 64.00  |
| siABCE1   | 50.71     | 22.63  | 26.31 | 9.86   | 68.80      | 37.60  | 60.00  | 16.50  |
| siDYNC1H1 | 22.40     | 24.91  | 79.29 | 9.05   | 25.70      | 41.80  | 104.80 | 20.90  |
| siWRAP53  | 2.90      | 28.11  | 18.45 | 38.53  | 7.50       | 53.00  | 35.60  | 74.90  |
| siATAD5   | 55.60     | 16.49  | 25.01 | 22.60  | 80.00      | 30.30  | 40.90  | 23.70  |
| siCCN4    | 17.85     | 18.51  | 23.89 | 42.10  | 53.00      | 30.50  | 32.30  | 63.10  |
| siENY2    | 15.62     | 29.06  | 24.64 | 16.54  | 32.70      | 38.70  | 49.70  | 44.00  |
| siCIAO2B  | 24.41     | 7.62   | 15.48 | 26.18  | 55.40      | 24.40  | 28.10  | 64.20  |
| siH1-10   | 19.98     | 38.30  | 16.89 | 10.30  | 26.20      | 48.60  | 32.10  | 37.80  |
| siLUC7L   | 36.19     | 6.67   | 7.84  | 22.01  | 43.50      | 18.50  | 29.50  | 46.80  |
| siRFC1    | 12.31     | 15.79  | 20.99 | 0.60   | 13.60      | 20.00  | 26.80  | 3.50   |
| siMDN1    | 16.23     | 10.86  | 8.92  | 28.03  | 50.30      | 30.80  | 21.50  | 53.00  |
| siSTK24   | 7.04      | 1.81   | 17.66 | 29.89  | 23.10      | 7.50   | 35.80  | 54.50  |
| siXRCC5   | 8.08      | 6.89   | -1.50 | -2.68  | 17.10      | 11.20  | -8.10  | -5.90  |

Supplemental Figures and Figure Legends

Supplemental Figure S1

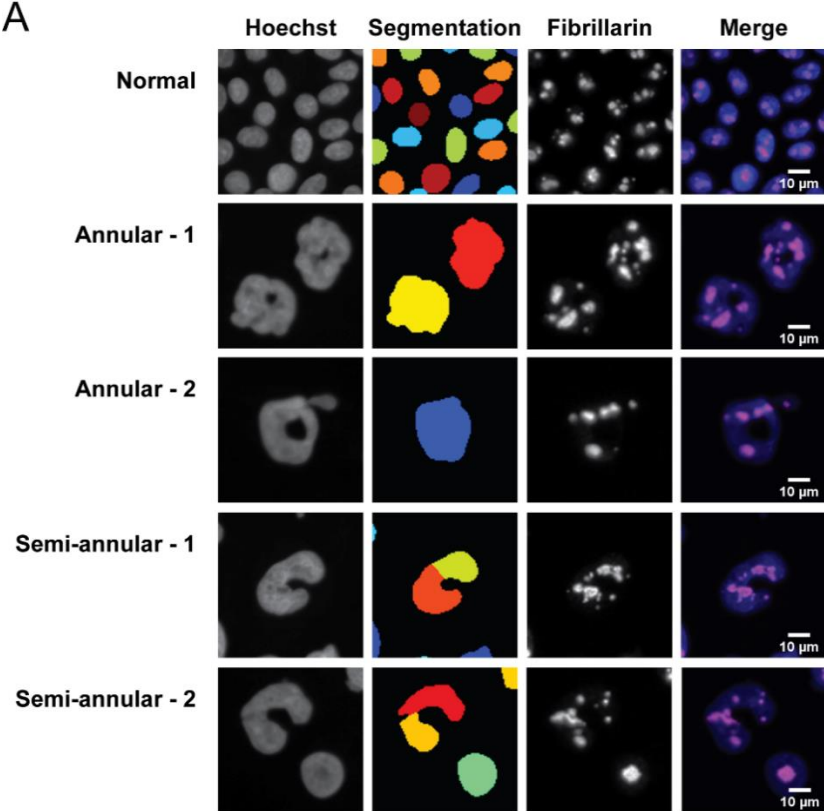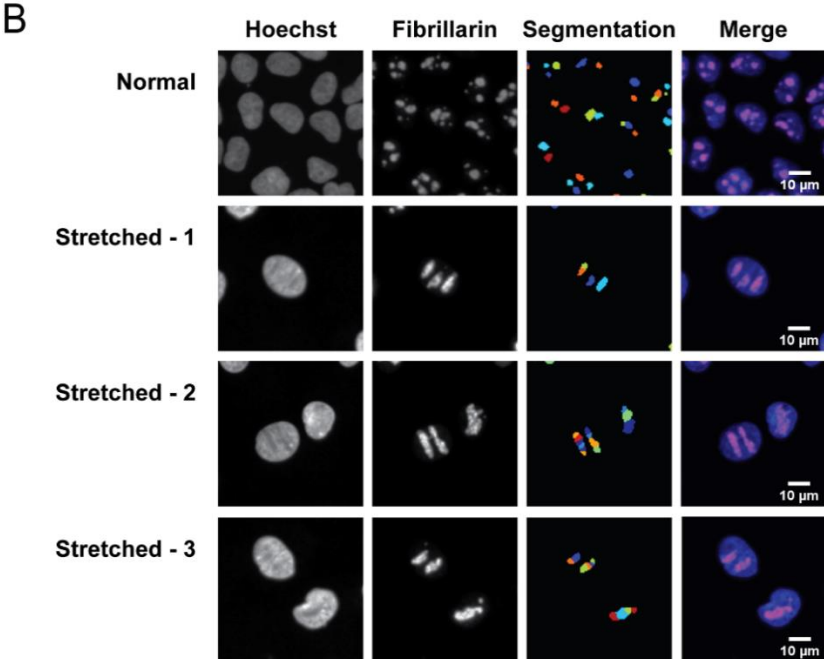

**Supplemental Figure S1.** Analysis of CellProfiler pipeline identification of atypical nuclei and nucleoli reveals poor segmentation in some cases. In an observational analysis, we looked at a subset of screen images where atypical nuclei and nucleoli were observed. (A) Pipeline segmentation of annular and semi-annular nuclei revealed inconsistent nuclear identification. Annular nuclei were sometimes segmented as a single nucleus, whereas semi-annular nuclei were sometimes segmented as more than one nucleus. Each colored spot represents a single segmented nucleus. In the merge, blue=Hoechst (nuclei) and pink=fibrillarin (nucleoli). Normal nuclei shown were from siRISC-free and atypical nuclei shown were from siINCENP. (B) Pipeline segmentation of “stretched” nucleoli were sometimes incorrectly identified as multiple nucleoli. Each colored spot represents a single segmented nucleolus. In the merge, blue=Hoechst (nuclei) and pink=fibrillarin (nucleoli). Normal nucleoli shown were from siRISC-free and atypical nucleoli shown were from siMDN1.

# Supplemental Figure S2

**A**

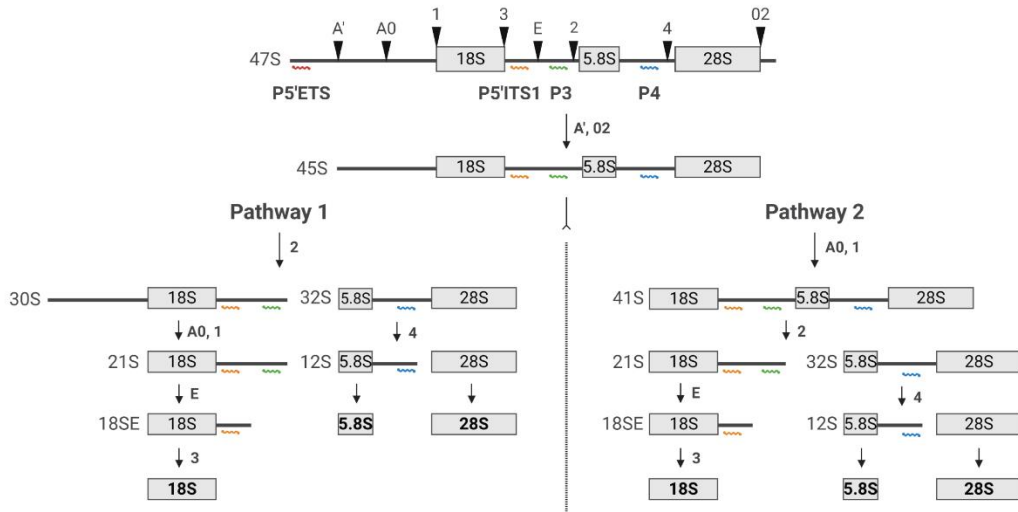

**B**

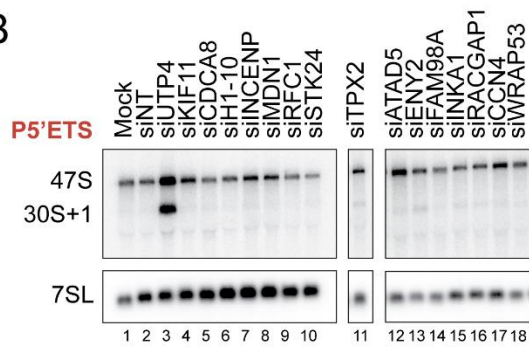

**C**

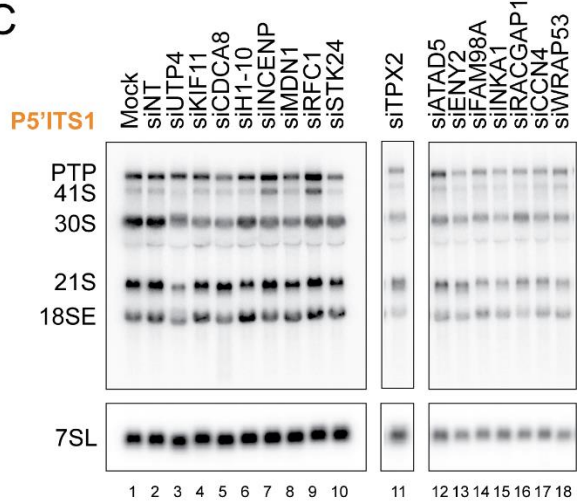

**D**

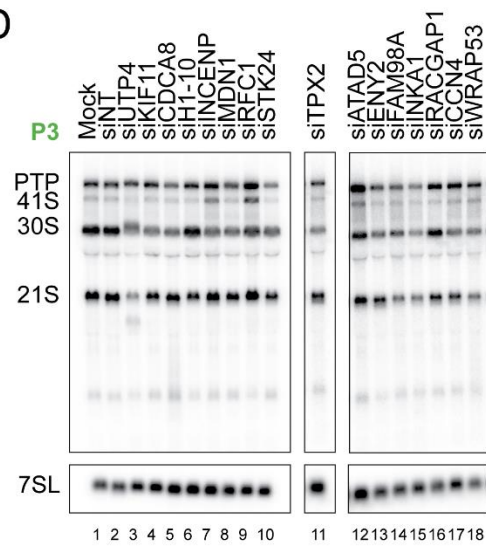

**E**

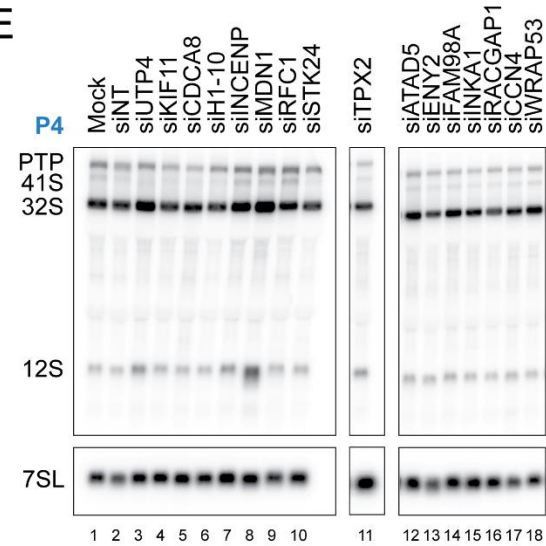

**Supplemental Figure S2.** Qualitative analysis of pre-rRNA intermediates reveals no obvious pre-rRNA processing defects. Depletion of a subset of nucleolar (n=7) and non-nucleolar (n=7) hits in MCF10A cells were tested by northern blot to ask whether depletion affects steady-state levels of pre-rRNA intermediates, and whether pre-rRNA processing defects can be inferred by observed changes in precursor-product relationships. (A) Pre-rRNA processing diagram labeled with the oligonucleotide probes used to detect pre-rRNA intermediates. The two predominant pathways for releasing the mature ribosomal RNAs (18S, 5.8S, and 28S) from the primary 47S transcript are depicted. Cleavage sites are indicated with black triangles and are listed next to the black arrows. (B) Representative northern blots using probe P5'ETS. (C) Representative northern blots using probe P5'ITS1. (D) Representative northern blots using probe P3. (E) Representative northern blot using probe P4. In each blot, mock and siNT were included as negative controls, and siUTP4 was included as a positive control. PTP=primary transcript plus, 43S-47S.

# Supplemental Figure S3

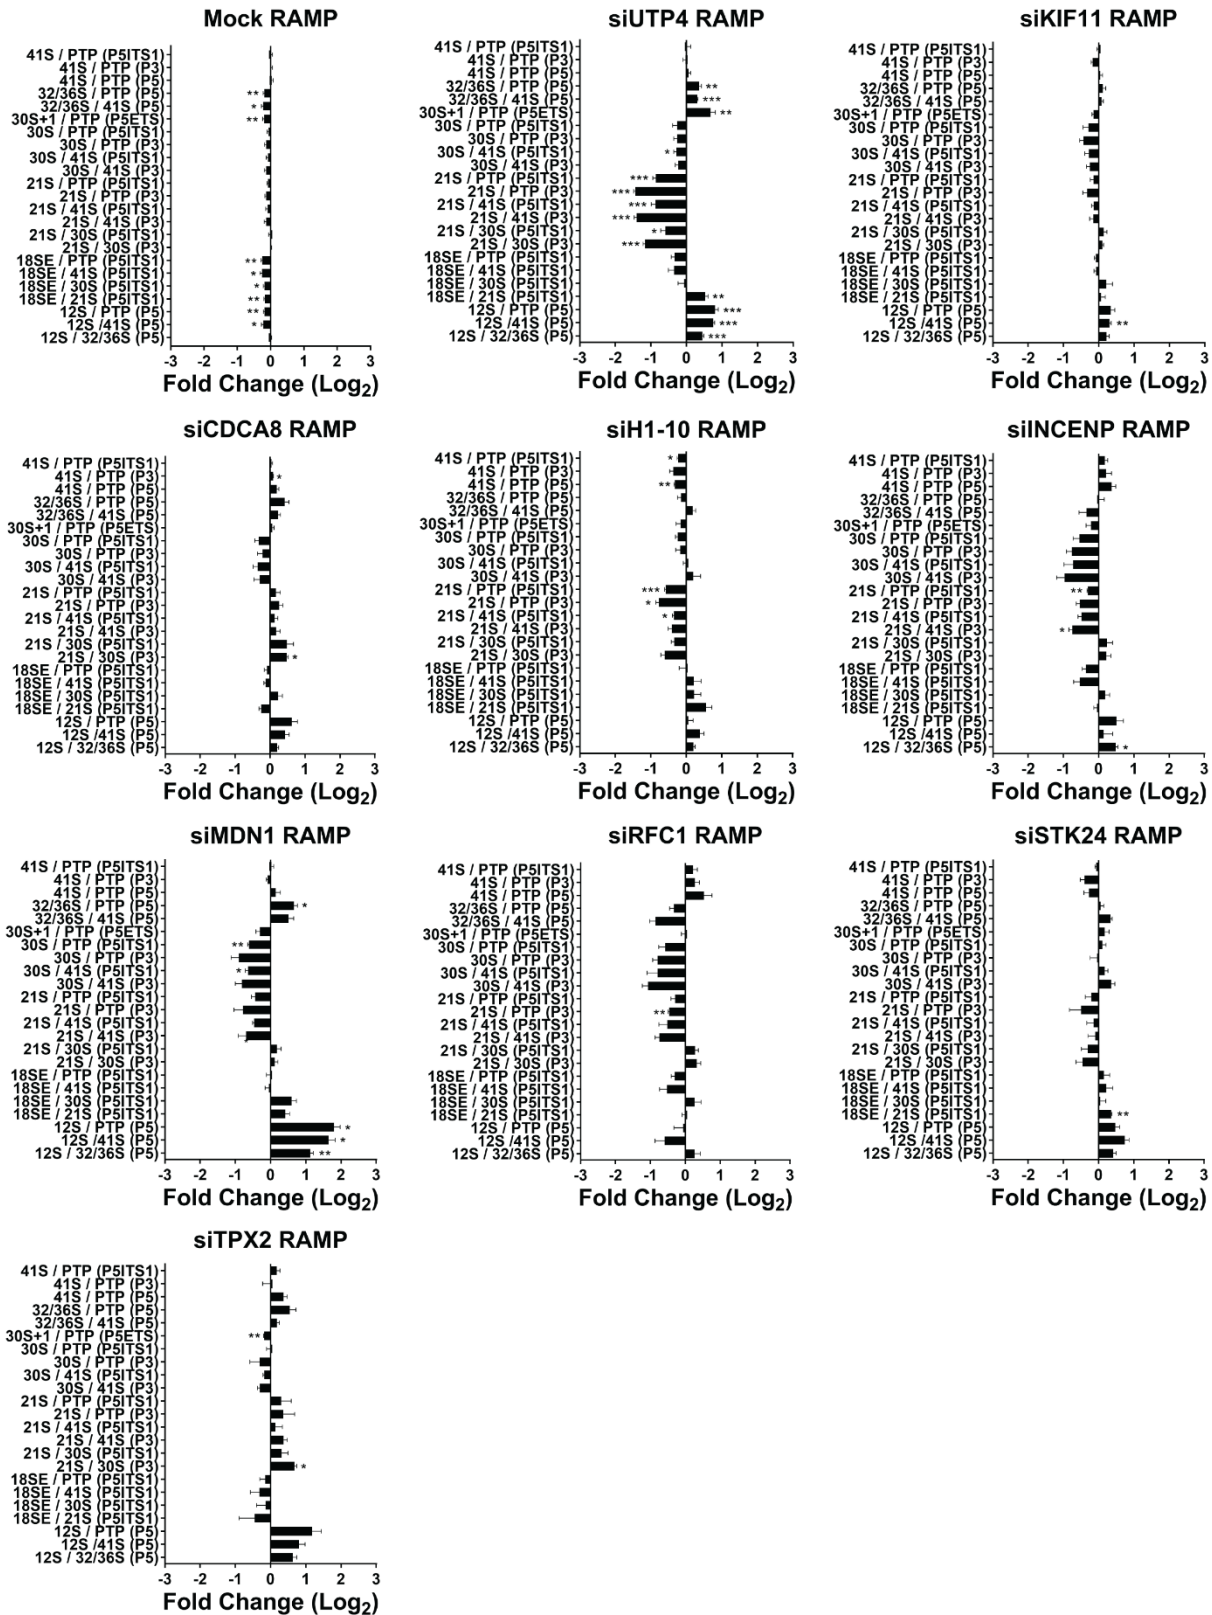

**Supplemental Figure S3.** Quantitative analysis of the northern blots of nucleolar hits reveals MDN1-depletion significantly affects processing of the 12S pre-rRNA. Quantitative analysis of the northern blots of nucleolar hits in Supplemental Figure S2 was performed by Ratio Analysis of Multiple Precursors (RAMP) relative to siNT (mean  $\pm$  SD). Mock-treated cells and UTP4-depleted cells were included as negative and positive controls, respectively. Depletion of the screen positive control, KIF11, was also analyzed. Statistical significance was calculated for 3 replicates by unpaired t tests for each ratio with the Holm-Sidak method of correction for multiple comparisons (\*=adjusted  $p < 0.05$ , \*\*=adjusted  $p < 0.01$ , \*\*\*=adjusted  $p < 0.001$ ;  $n=3$ ). PTP=primary transcript plus, 43S-47S.





**Supplemental Figure S4.** Quantitative analysis of the northern blots of non-nucleolar hits reveals pre-rRNA processing is largely unaffected. Quantitative analysis of the northern blots of non-nucleolar hits in Supplemental Figure S2 was performed by Ratio Analysis of Multiple Precursors (RAMP) relative to siNT (mean  $\pm$  SD). Statistical significance was calculated for 3 replicates by unpaired t tests for each ratio with the Holm-Sidak method of correction for multiple comparisons (\*=adjusted  $p < 0.05$ , \*\*=adjusted  $p < 0.01$ , \*\*\*=adjusted  $p < 0.001$ ;  $n=3$ ). PTP=primary transcript plus, 43S-47S.

# Supplemental Figure S5

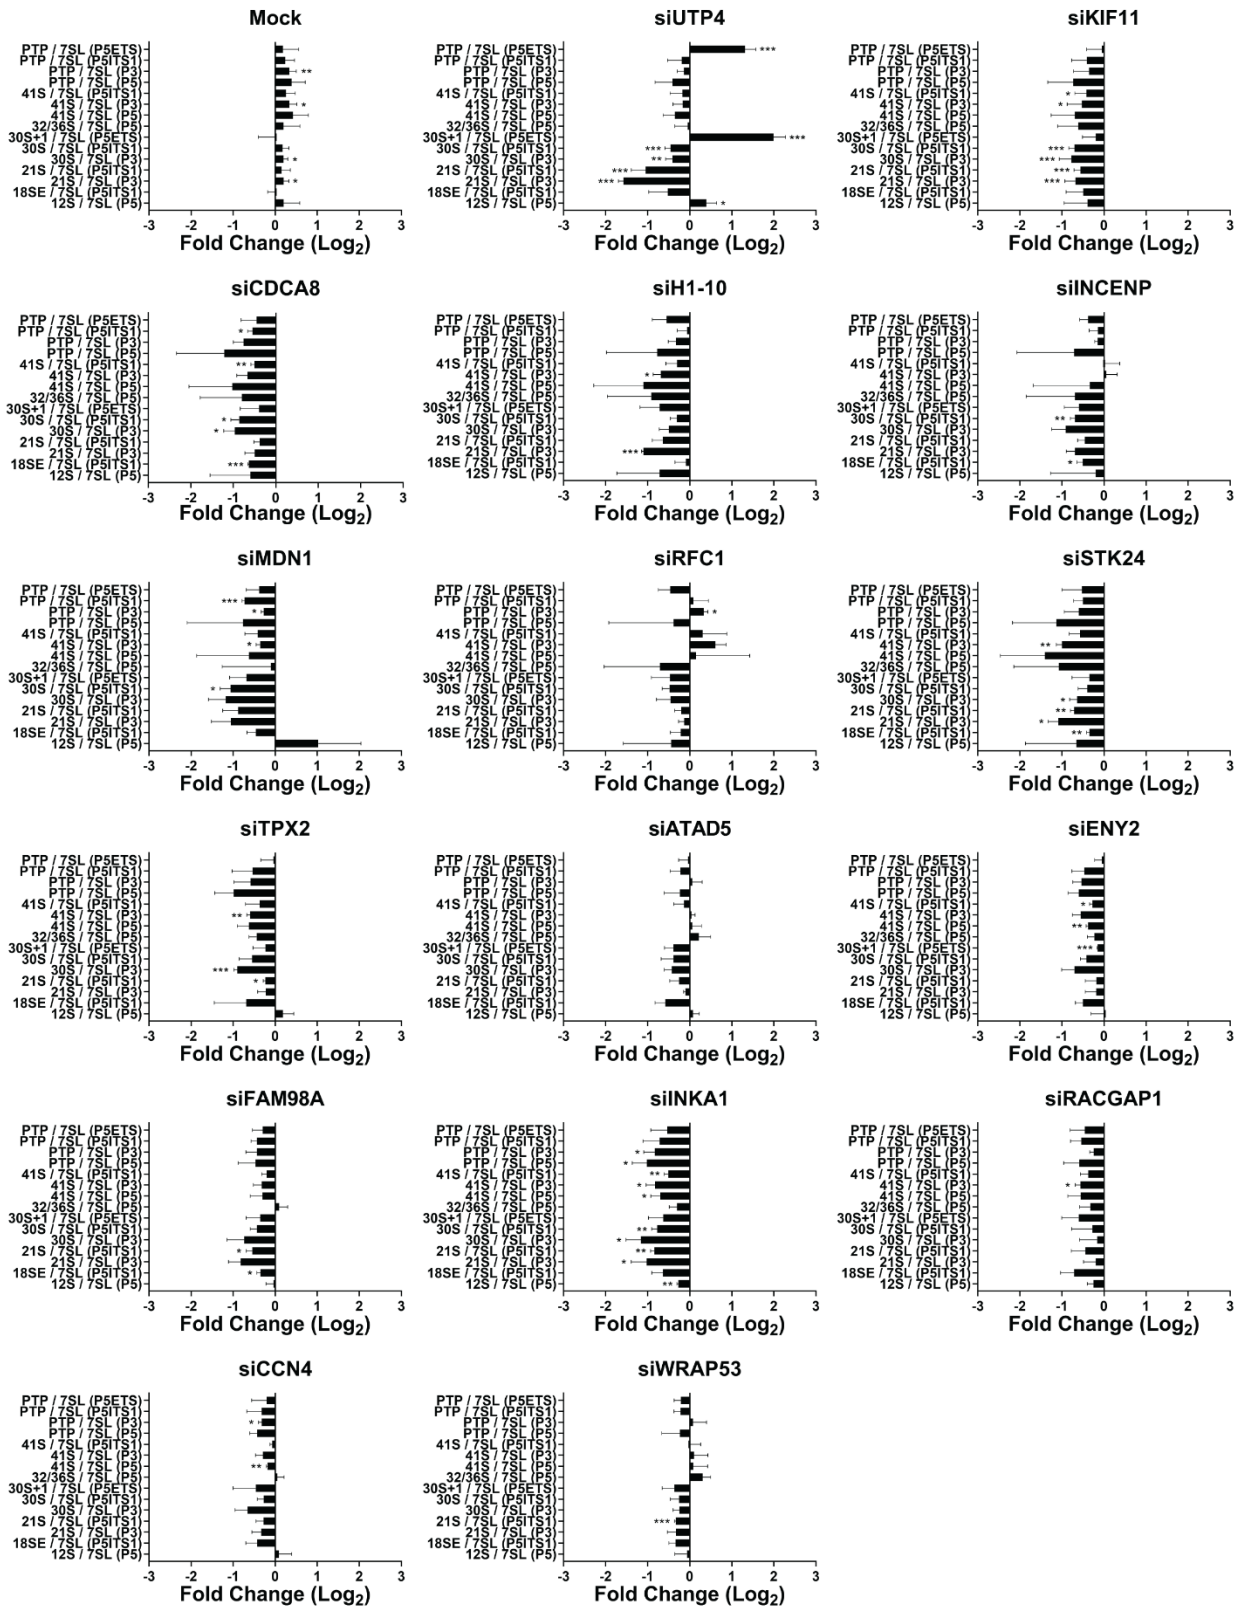

**Supplemental Figure S5.** Quantitative analysis of pre-rRNA intermediates relative to the 7SL RNA loading control reveals a trending, but non-significant, decrease in levels of pre-rRNA intermediates. Quantitative analysis of the northern blots in Supplemental Figure S2 was performed relative to the RNA component of the signal recognition particle, 7SL, relative to siNT (mean  $\pm$  SD). Statistical significance for 3 replicates was calculated by unpaired t tests for each ratio with the Holm-Sidak method of correction for multiple comparisons (\*=adjusted  $p < 0.05$ , \*\*=adjusted  $p < 0.01$ , \*\*\*=adjusted  $p < 0.001$ ;  $n=3$ ). PTP=primary transcript plus, 43S-47S.

Supplemental Figure S6

A

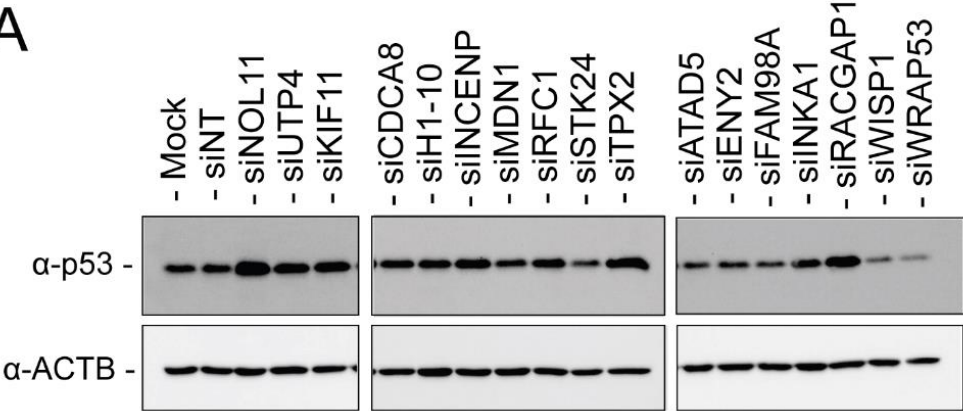

B

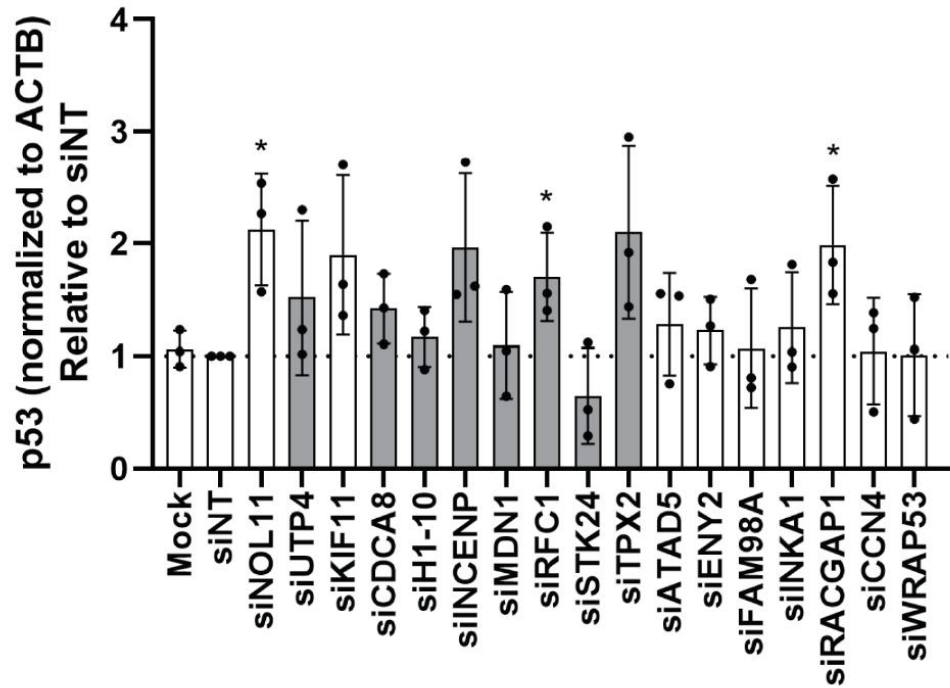

**Supplemental Figure S6.** Depletion of only 2 hits results in the stabilization of the tumor suppressor protein, p53. (A) Representative western blots from the total protein harvested from MCF10A cells depleted of the screen hits in Figure 7 and Table 1 (in bold). Protein was quantified by Bradford assay and run on a 10% SDS-PAGE gel followed by western blots using an HRP-conjugated antibody to the tumor suppressor protein, p53 (TP53). Beta-actin (ACTB) was used as a loading control. Mock and siNT-treated cells=negative controls. siNOL11=positive control. siUTP4 was included as a known ribosome biogenesis factor, and siKIF11 was included because it was the screen positive control and elicited a RNAPI and protein synthesis defect upon treatment. (B) Quantification of results in A from 3 replicates. ImageJ was used to quantify the differences in p53 signal intensity, normalized to the beta-actin signal intensity. Statistical significance for the 3 replicates relative to siNT was calculated by two-tailed, unpaired t tests ( $*=p<0.05$ ;  $n=3$ ). Data are shown as a bar graph (mean  $\pm$  SD), and with each replicate represented as a dot. Gray=nucleolar proteins; white=non-nucleolar proteins.
